# Supplementary material for: A new Early Oligocene toothed ‘baleen’ whale (Mysticeti: Aetiocetidae) from western North America: one of the oldest and the smallest
Source: PubMed Central journal article supplement (PMC4807455; doi:10.1098/rsos.150476), 2015-12-02
Supplement: rsos150476supp1.pdf [file rsos150476supp1.pdf]

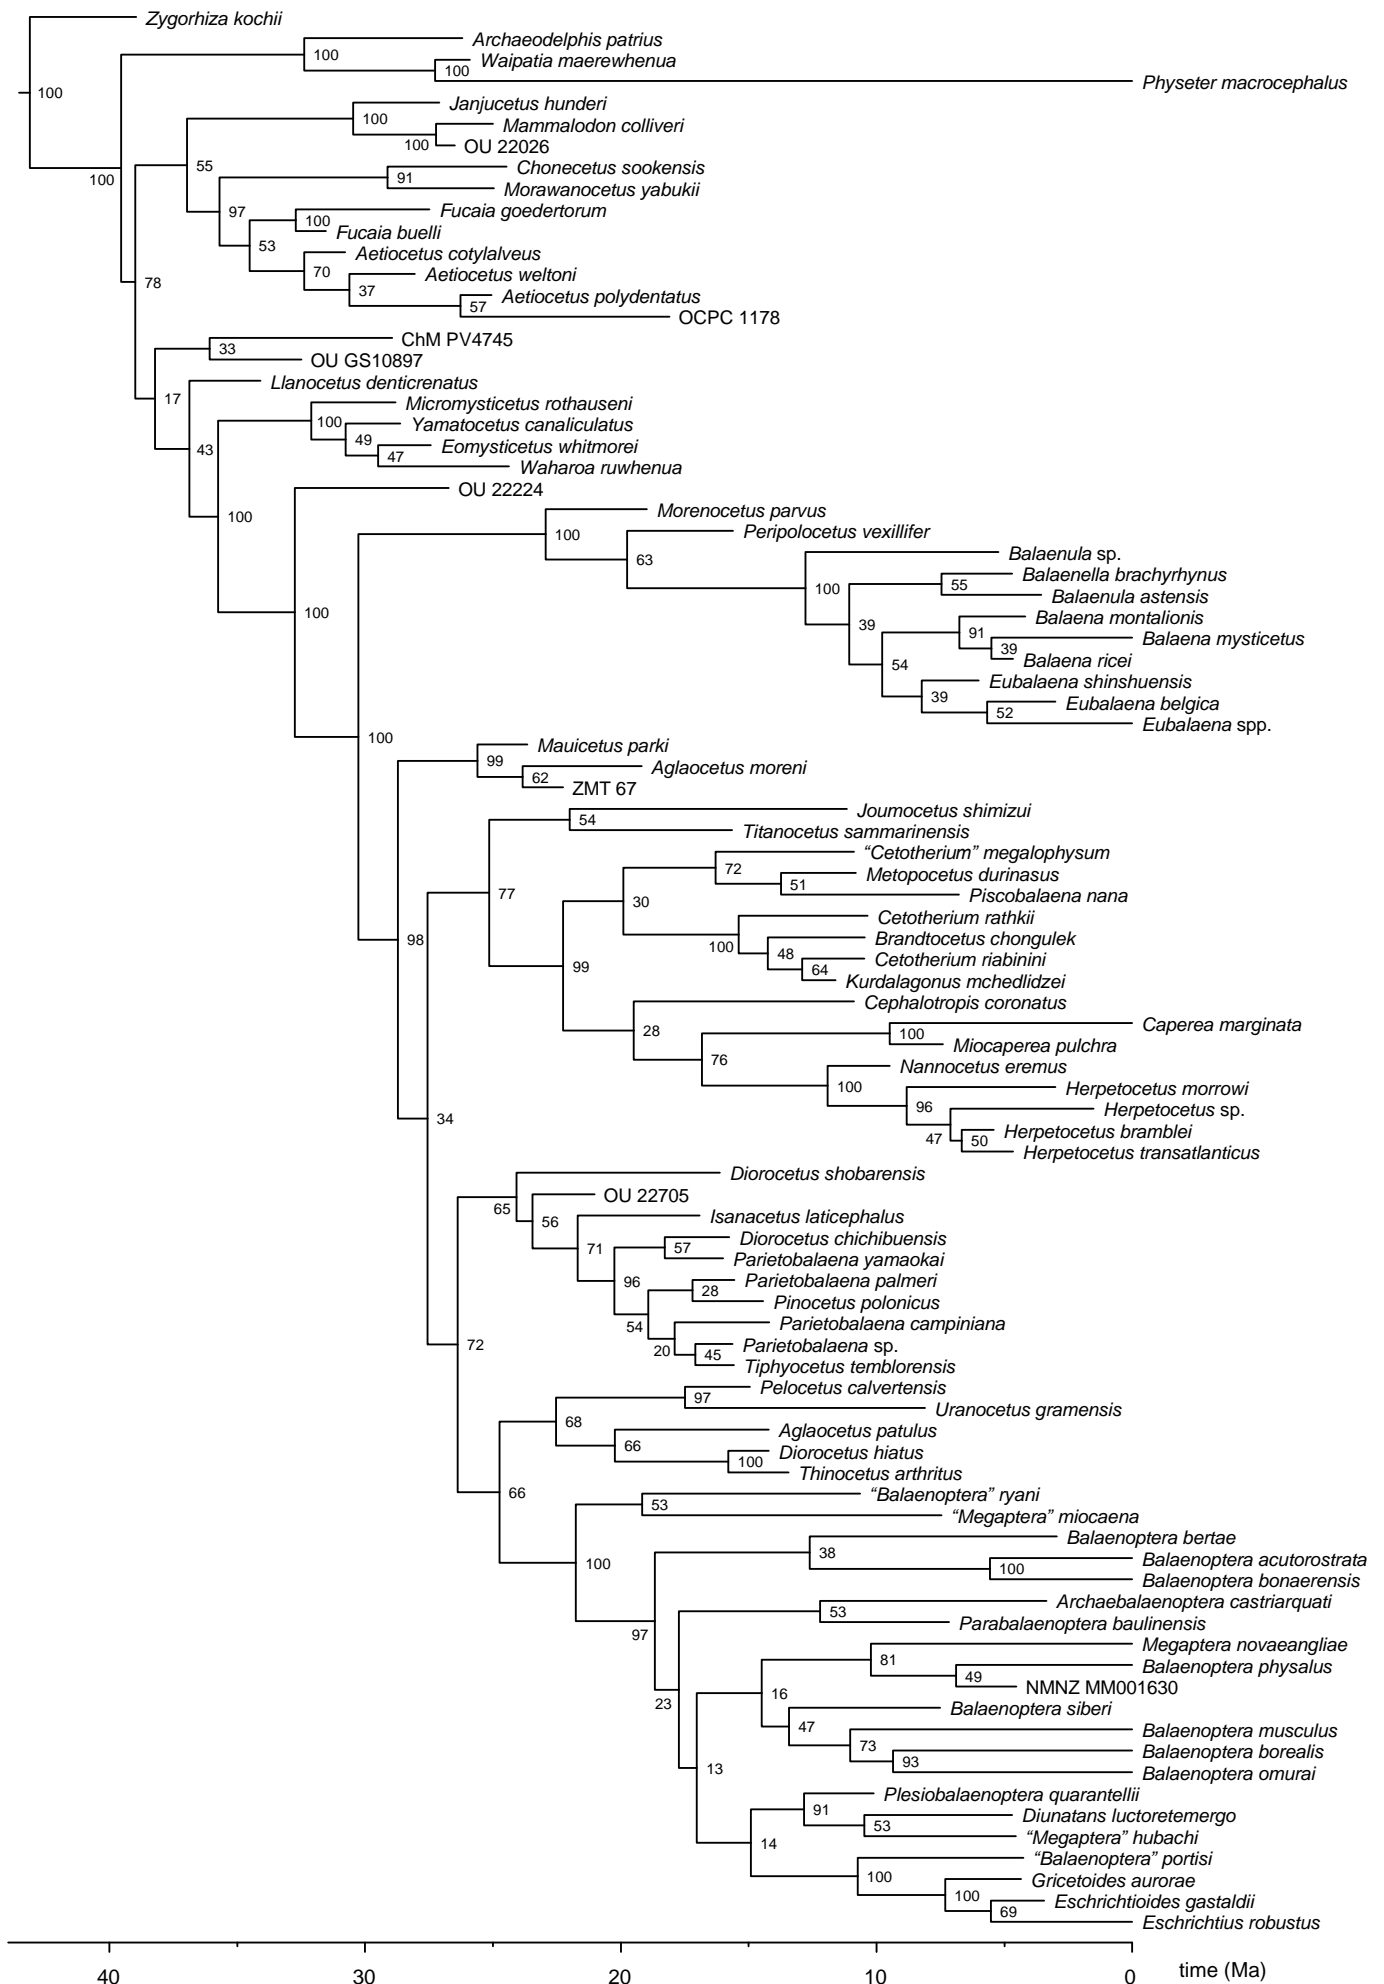

**Supplementary Figure S1.** Bayesian total evidence majority-rule consensus tree, showing all compatible clades.

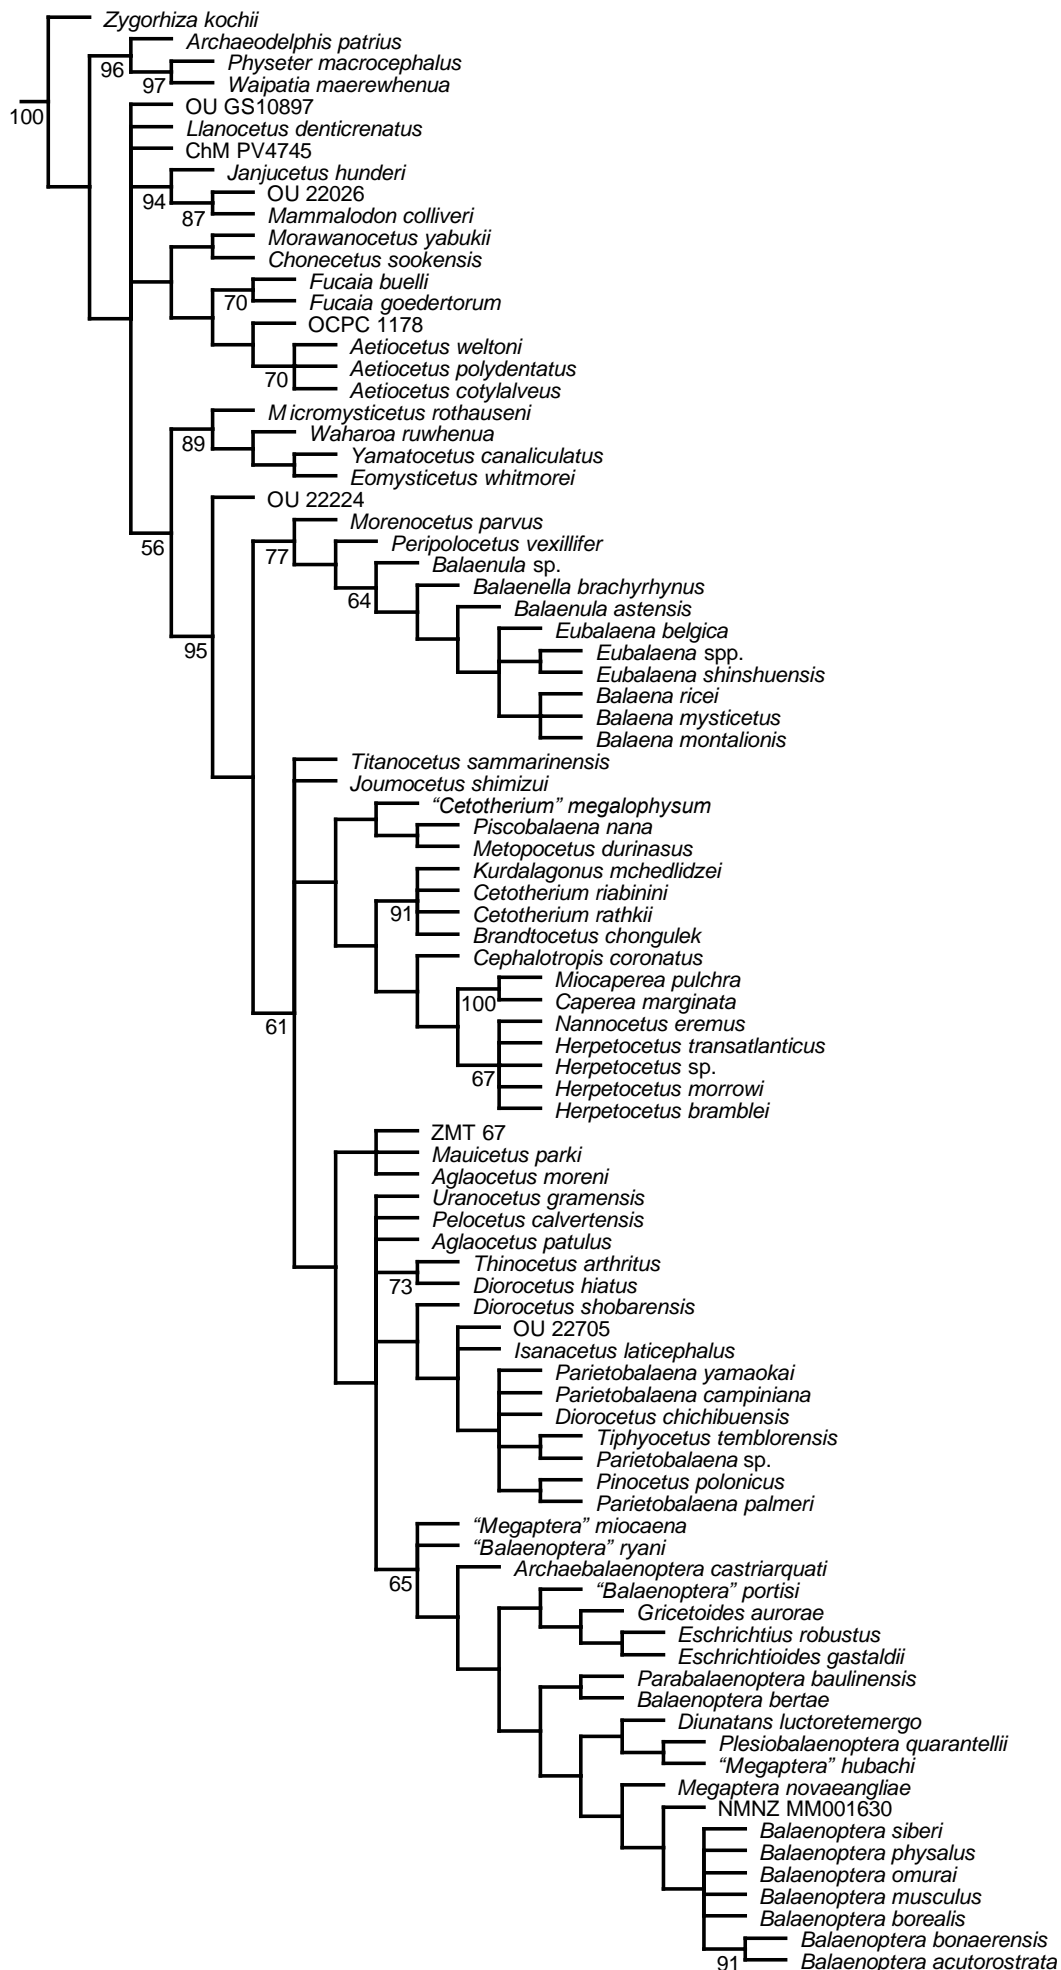

Supplementary Figure S2. Strict consensus of the equally weighted maximum parsimony analysis.

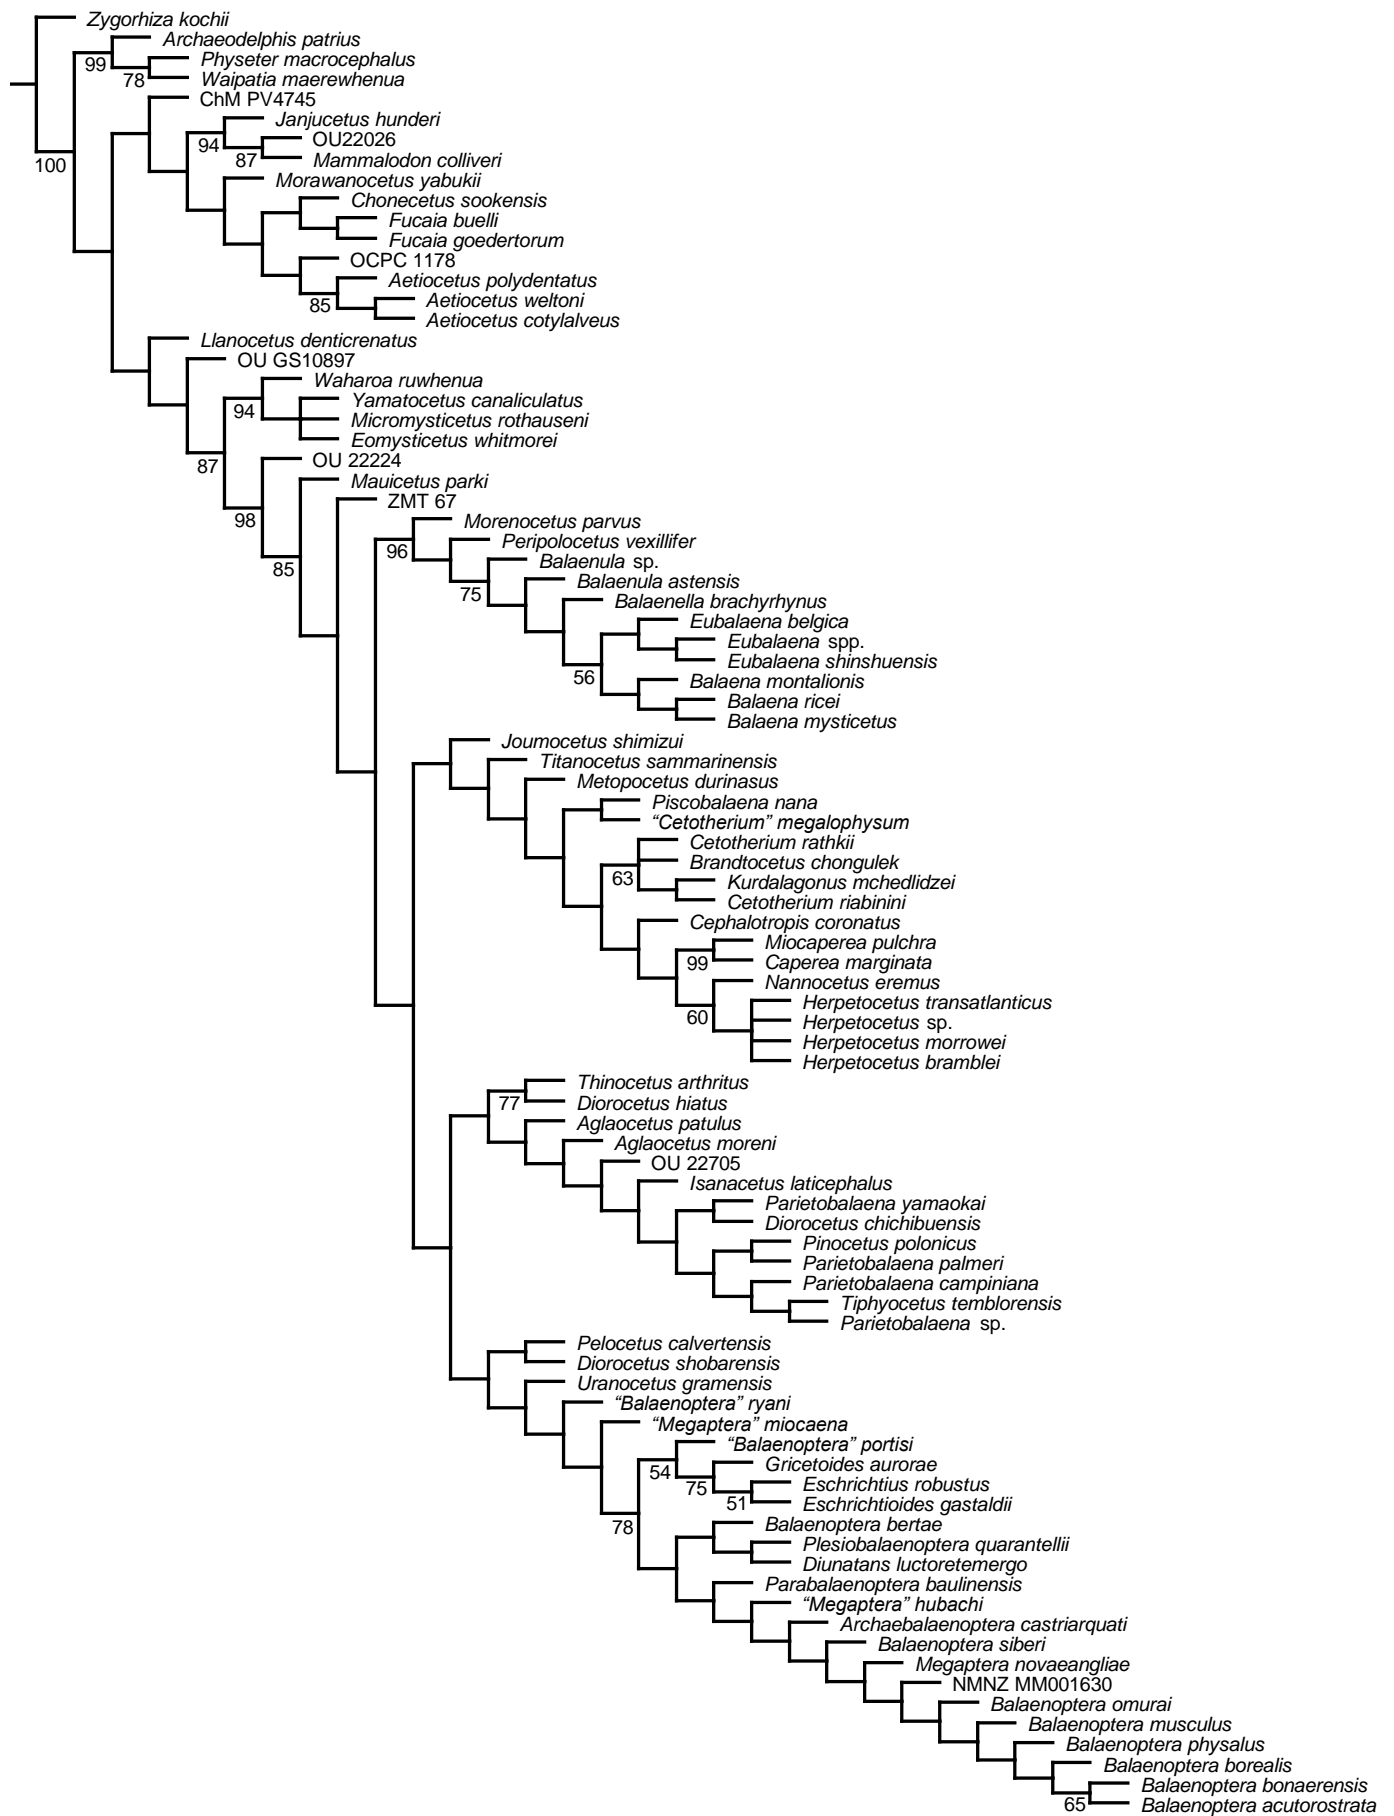

Supplementary Figure S3. Strict consensus of the maximum parsimony analysis under implied weighting.
